# Supplementary material
Source: PubMed Central journal article supplement (PMC7388540)

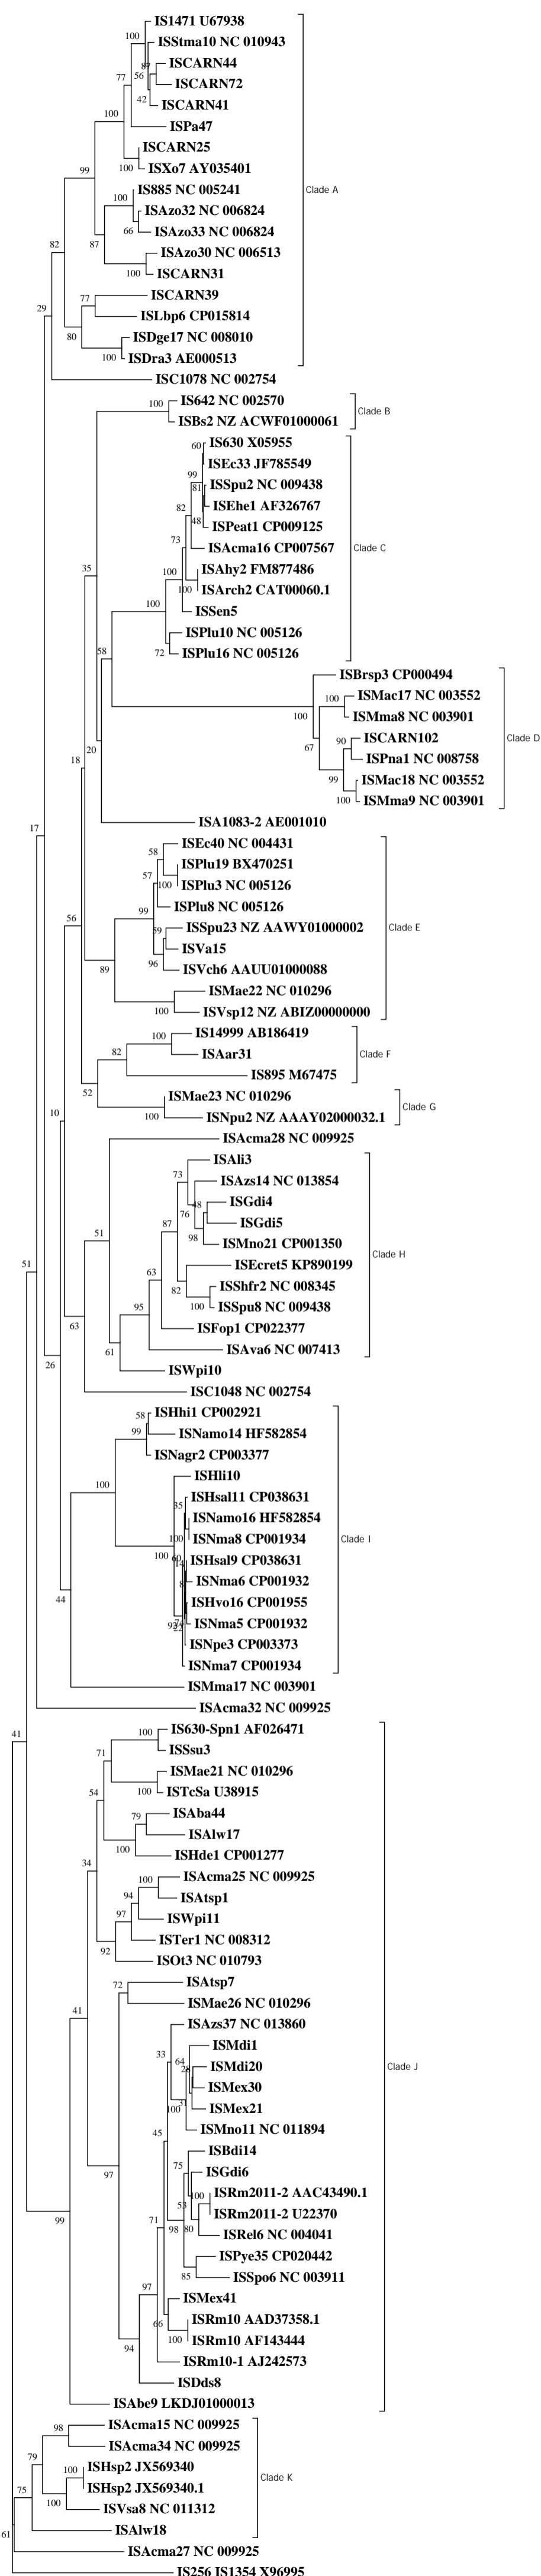

Supplement: 13100_2020_220_MOESM1_ESM.pdf [file 13100_2020_220_MOESM1_ESM.pdf]
